# Supplementary material for: Lab life, seasons and chromosome fusions affect non-cell-autonomously proliferation and neurogenesis, but not oligodendrogenesis, in mice and voles
Source: Springer Nature journal article supplement (doi:10.1038/s41598-025-01670-3), 2025-05-28
Supplement: MOESM1 [file 41598_2025_1670_MOESM1_ESM.pdf]

1

Supplemental Figures and Tables

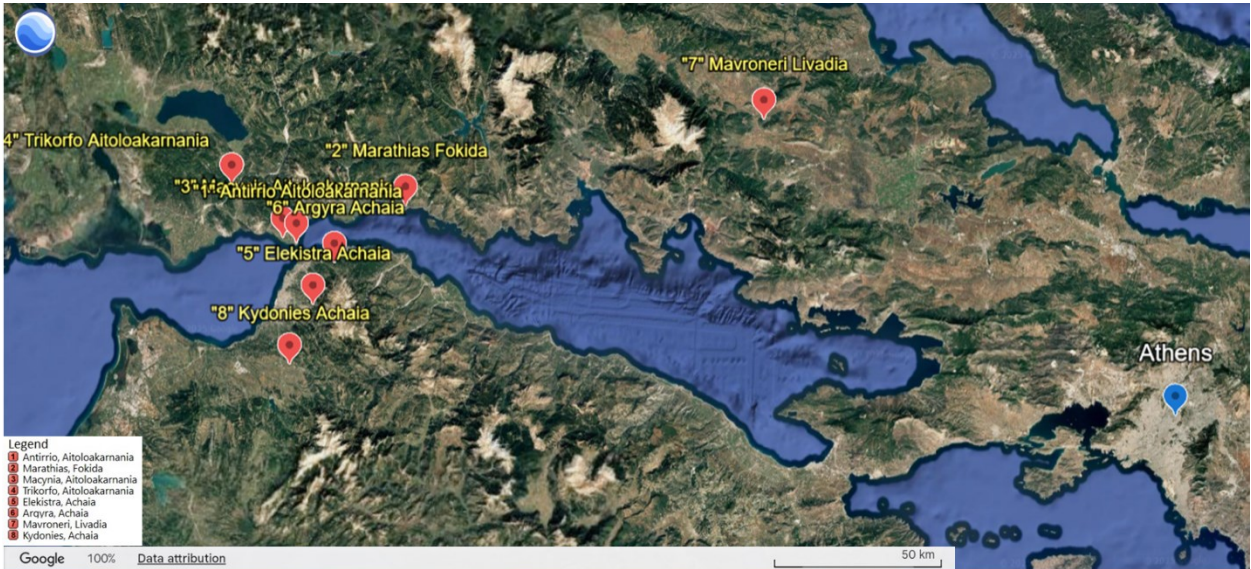

|        |         | Lab 40 | Wild 40 | Wild 37  | Wild 30  | Wild 26-30 |              | Microtus |
|--------|---------|--------|---------|----------|----------|------------|--------------|----------|
| AUTUMN | ▲ E3    | ▲ R581 | ▲ R586  | ✱ Wild 4 |          | ▲ Wild 1   | ◆ Microtus 1 |          |
|        | ▲ E5    | ▲ R582 | ▲ R599  |          |          | ▲ Wild 2   | ◆ Microtus 2 |          |
|        | ▲ E4    | ▲ R583 | ▲ R597  |          |          | ▲ Wild 3   | ◆ Microtus 3 |          |
|        | ▲ E8    | ▲ R584 | ▲ R600  |          |          | ▲ Wild 5   | ◆ Microtus 4 |          |
|        | ▲ Lab15 |        |         |          |          | ▲ Wild13   | ◆ Microtus 5 |          |
|        | ▲ Lab16 |        |         |          |          |            | ◆ Microtus 6 |          |
|        | ▲ Lab17 |        |         |          |          |            | ◆ Microtus 7 |          |
|        | ▲ Lab18 |        |         |          |          |            | ◆ Microtus 8 |          |
|        | ▲ Lab29 |        |         |          |          |            | ◆ Microtus 9 |          |
|        | ▲ Lab30 |        |         |          |          |            |              |          |
|        | ▲ Lab31 |        |         |          |          |            |              |          |
|        |         |        |         |          |          |            |              |          |
|        |         | Lab 40 |         | Wild 30  | Wild 28  | Wild 27    | Wild 26      | Microtus |
| SPRING | ■ 3     |        | ■ R614  | ✱ Wild 8 | ■ Wild7  | + Wild 11  |              | ◆ 625    |
|        | ■ E7    |        | ■ R617  |          | ■ Wild9  |            |              | ◆ 626    |
|        | ■ M     |        | ■ R619  |          | ■ Wild10 |            |              | ◆ 627    |
|        | ■ Lab37 |        | ■ R613  |          |          |            |              |          |
|        | ■ Lab39 |        | ■ Wild6 |          |          |            |              |          |
|        | ■ Lab40 |        |         |          |          |            |              |          |
|        | ■ Lab41 |        |         |          |          |            |              |          |
|        | ■ Lab42 |        |         |          |          |            |              |          |

### 3 **Supplemental Figure 1. Details of wild animal collections**

4 (Upper panel) Map of central Greece and northern Peloponnese, showing the collection  
5 areas of the different populations of wild animals. *Mus musculus domesticus* individuals, of  
6 different karyotypes, were captured at 6 different sites and *Microtus thomasi* at 2 sites. (1)  
7 Antirrio, Aitoloakarnania. (2) Marathias, Fokida. (3) Macynia, Altoloakarnania. (4) Trikorfo,  
8 Aitoloakarnania. (5) Elekistra, Achaia. (6) Argyra, Achaia. (7) Mavroneri, Voiotia. (8) Kydonies,  
9 Achaia. (Lower panel) Legend of the identity tag, of the gender (for female animals) and of  
10 the colour/shape with which each animal's measurements are depicted in the scatter plots.  
11 See also Supplemental Table 1. [The map was constructed in Google Earth and includes  
12 data from: Google, Data SIO, NOAA, U.S. Navy, NGA, GEBCO, Landsat/Copernicus, from  
13 the dates:14/12/2015–01/01/2021. It is used under the principles of fair use as described in  
14 Google Earth's "Terms of Service", available at  
15 [https://www.google.com/help/terms\\_maps/](https://www.google.com/help/terms_maps/))]

16

17

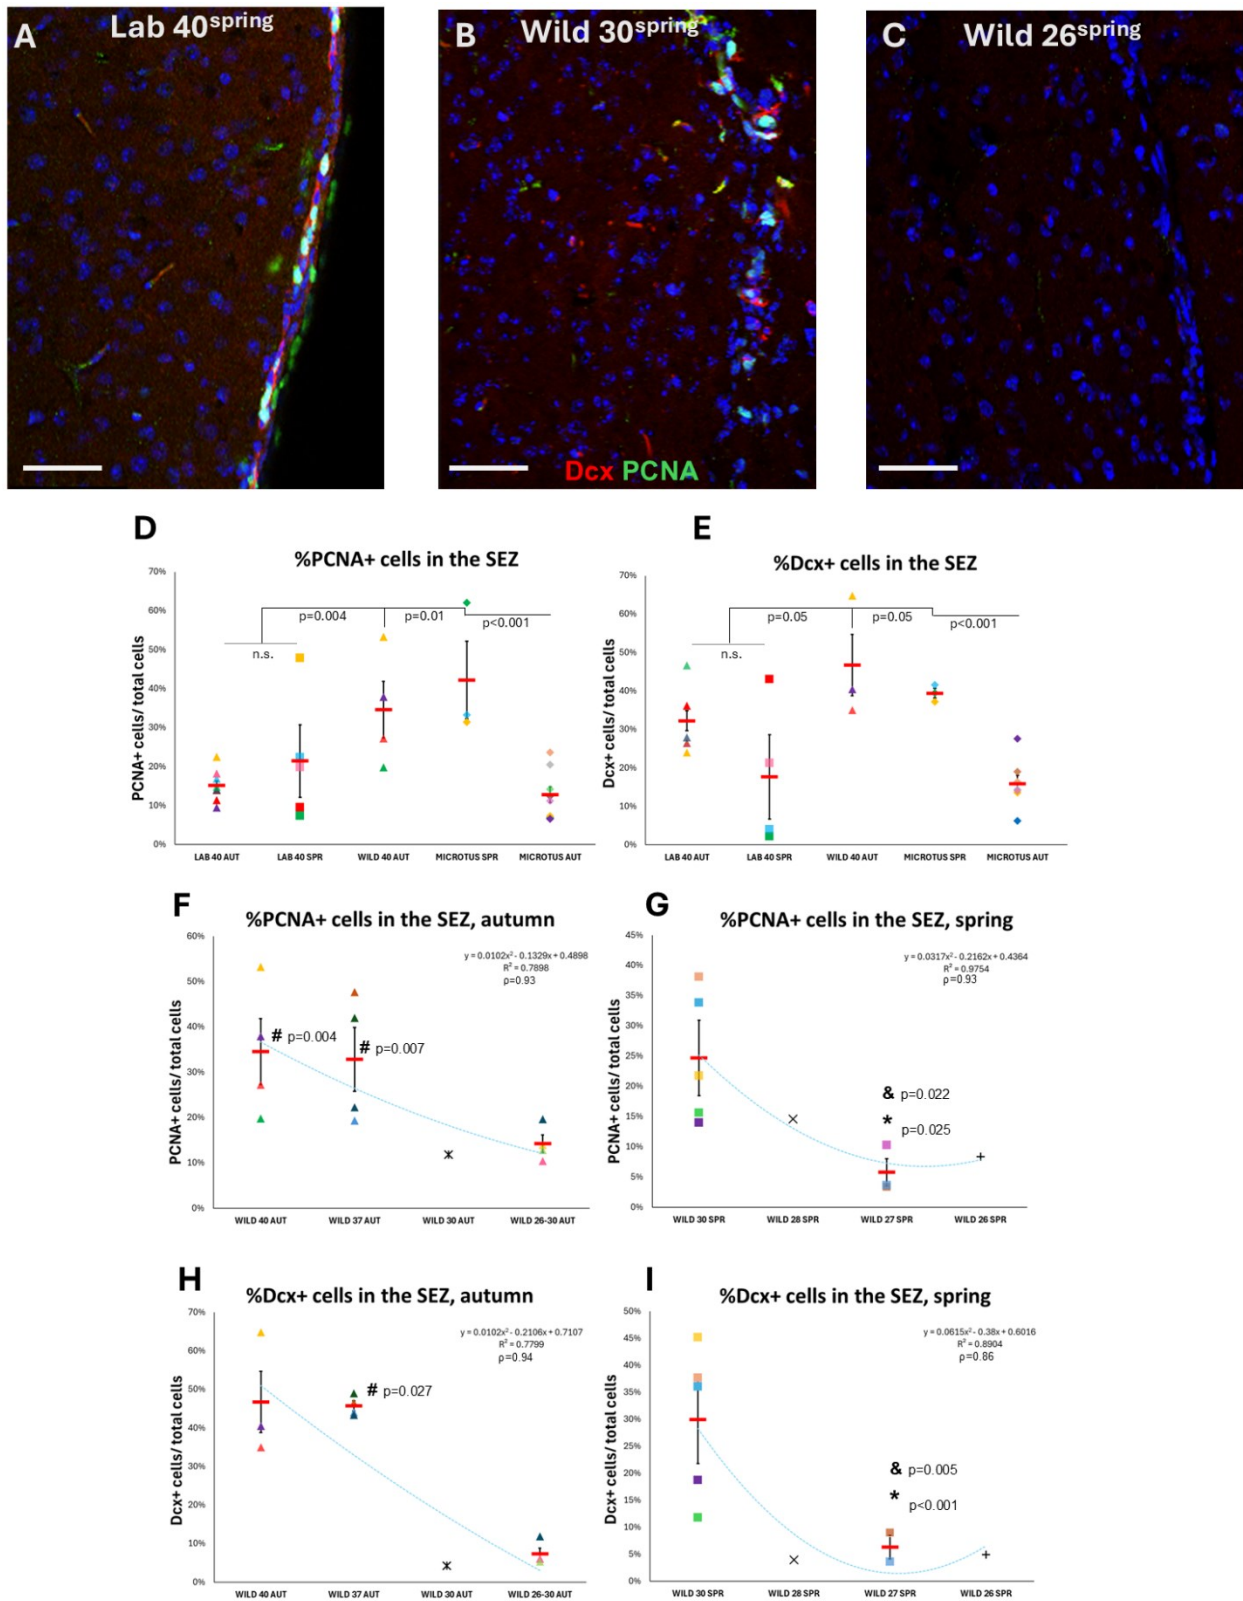

**Supplemental Figure 2. Effects of habitat, species, seasons and of chromosome numbers on the percentages of proliferating cells and of neuroblasts in the SEZ**

(A-C) Microphotographs of the SEZ in lab mice (A), Wild30 mice (B) and Wild26 mice (C), after immunostaining for PCNA (to mark proliferating cells, in green) and Dcx (to mark neuroblasts, in red). Note the stark reduction in the presence of PCNA<sup>+</sup> and Dcx<sup>+</sup> cells in the SEZ of Wild26 mice. [scale bars: 200µm]. (D,E) Scatter plot graphs showing the percentages of PCNA<sup>+</sup> and Dcx<sup>+</sup> cells within the SEZ of lab and wild rodent populations, at different seasons. (F,H) Graphs showing the percentages of PCNA<sup>+</sup> and Dcx<sup>+</sup> cells in wild mice captured in autumn, plotted against numbers of chromosomes. (G,I) Graphs showing the percentages of PCNA<sup>+</sup> and Dcx<sup>+</sup> cells in wild mice captured in spring, plotted against numbers of chromosomes. [Individual values are shown with different colours and shapes, as explained in Suppl. Figure 1. Mean values are shown with red lines and error bars depict the SEM. Comparisons with lab mice (#), with Wild<sup>2n=40</sup> (&) or Wild<sup>2n=37</sup> (\*) were performed using one-way ANOVA followed by Tukey's *post-hoc* analysis. The polynomial equation describing each plot, the R-squared value, as well as the Pearson's correlation ( $\rho$ ) are shown at the upper right of each graph.]

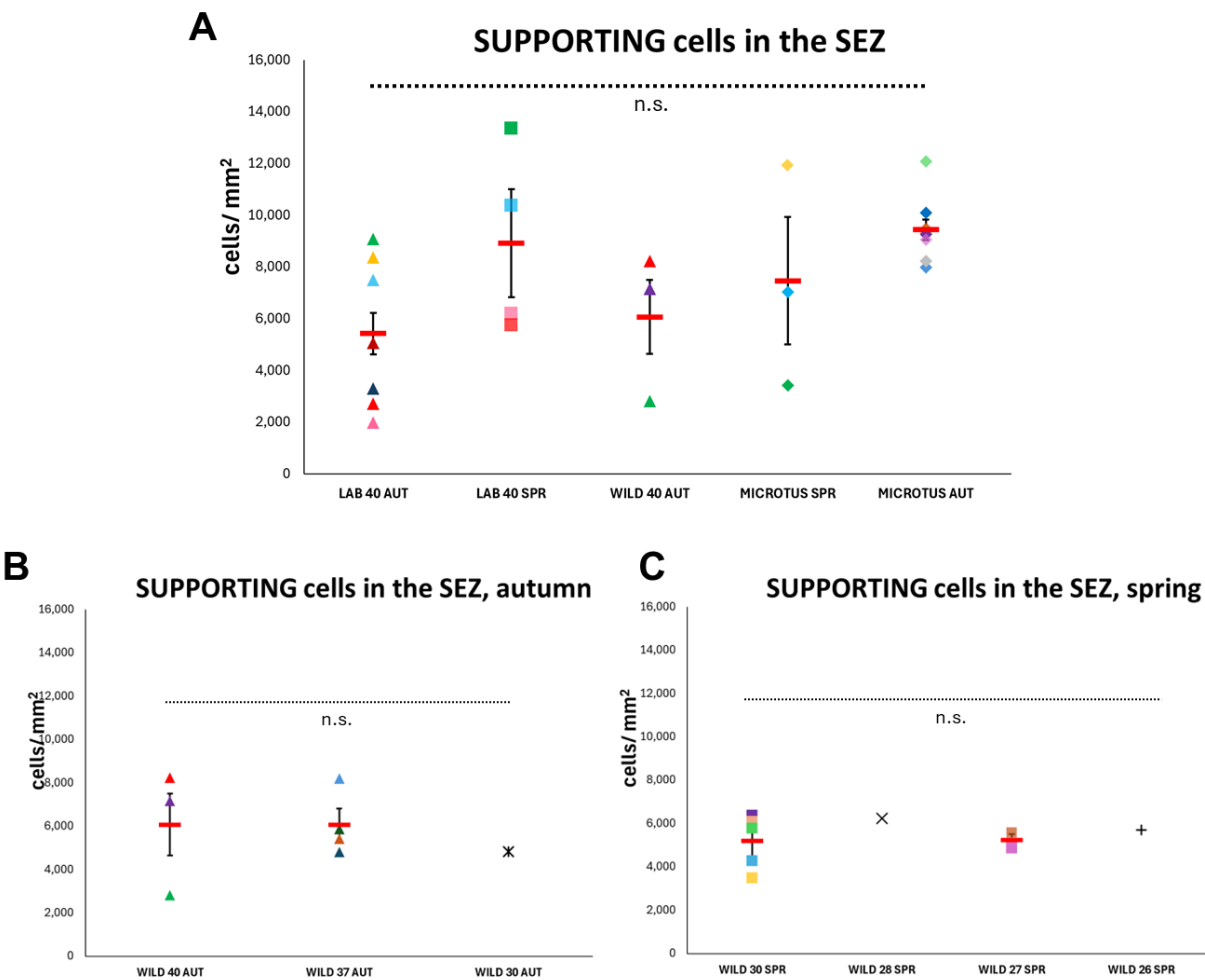

**Supplemental Figure 3. Effects of habitat, species, seasons and of chromosome numbers on the density of supporting cells in the SEZ**

(A-C) Scatter plot graphs of the density of supporting cells within the SEZ of different rodent populations, according to life conditions (lab or wild), seasons, species and numbers of chromosomes. [Individual values are shown with different colours and shapes, as explained in Suppl. Figure 1. Mean values are shown with red lines and error bars depict the SEM. Comparisons were performed using one-way ANOVA followed by Tukey's *post-hoc* analysis. "n.s.": not significant]



46

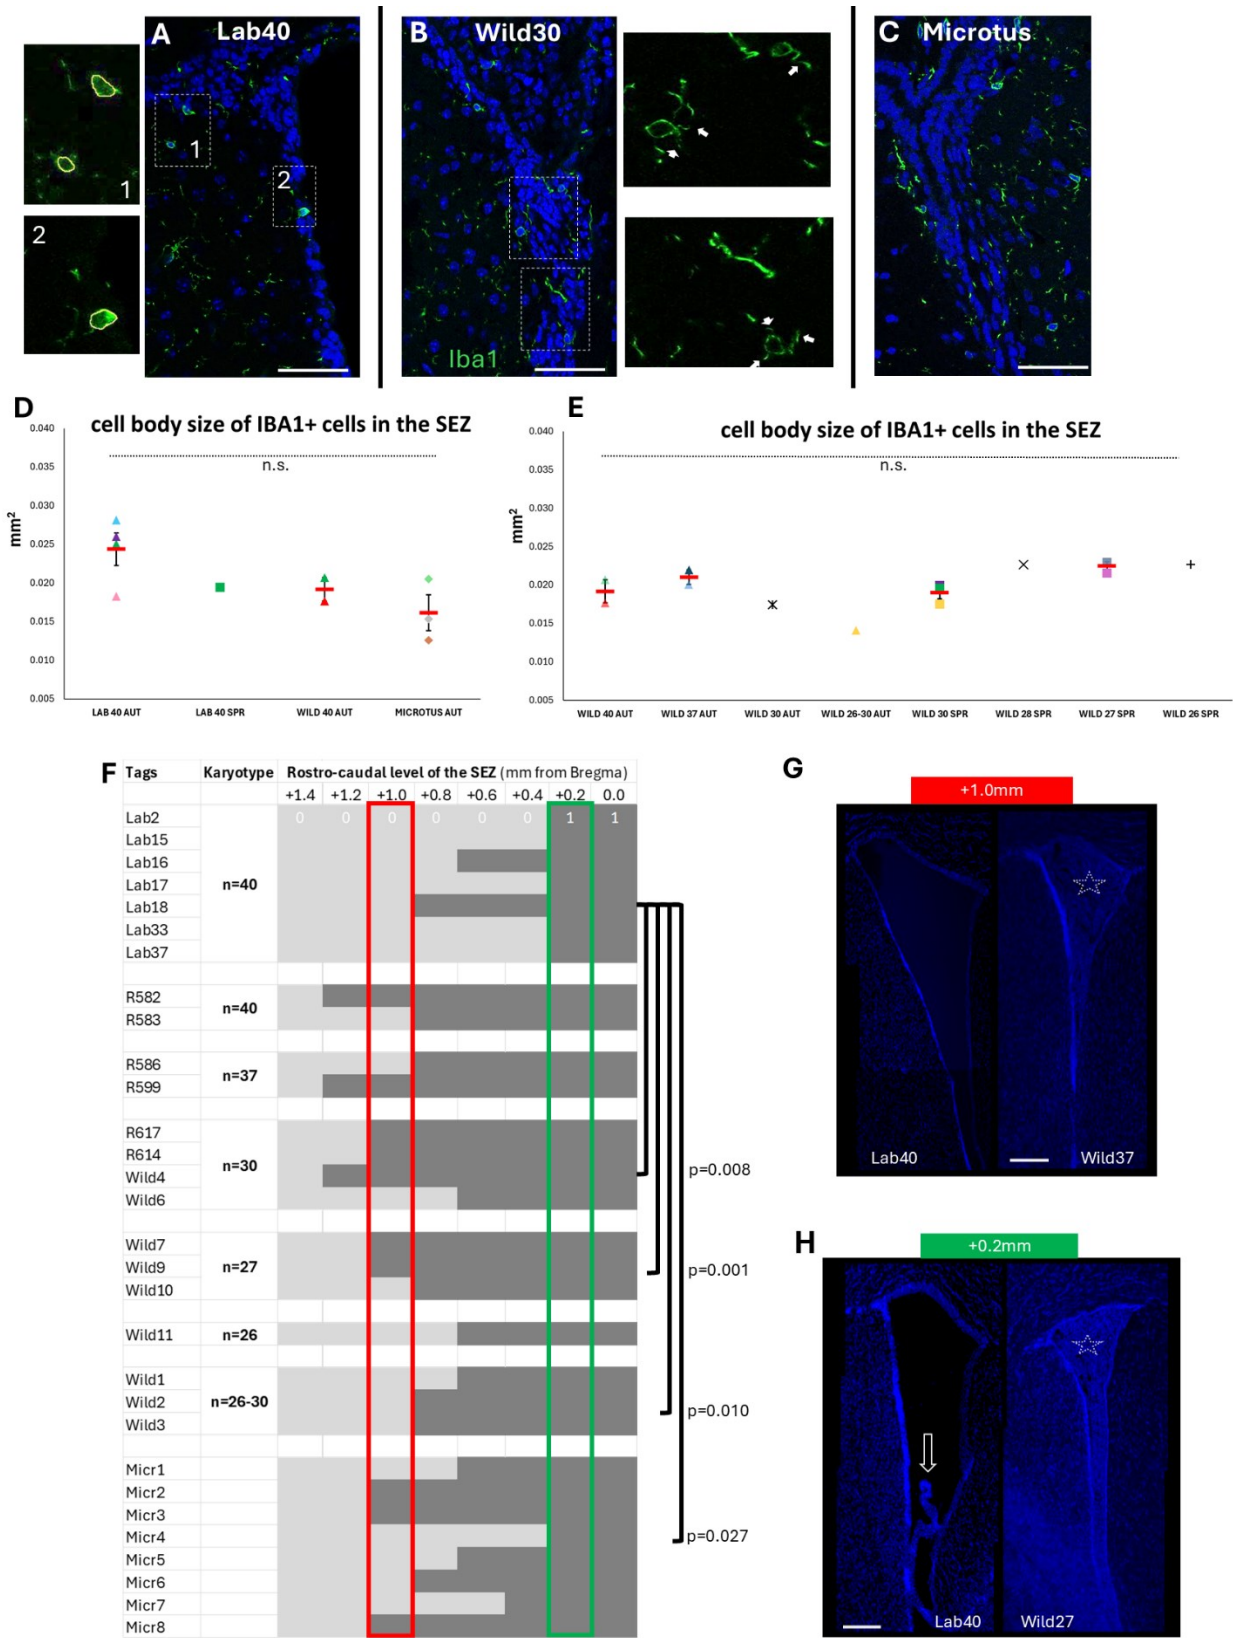

**Supplemental Figure 4. Effects of habitat, species, seasons and of chromosome numbers on the population of microglial cells and on the size of the choroid plexus**

(A-C) Microphotographs of the SEZ from brain sections immunostained for Iba1 (in green, to mark microglial cells). Note in “A” an indicative photo from a Lab40 mouse brain, showing examples of microglial cells and how their cell body was delineated to measure size (inboxes 1 and 2) using Fiji. In the inboxes of image “B”, from a Wild30 mouse brain, examples of microglial cell processes are shown (indicated by white arrows). In “C” an example of the same area and immunostaining in a *Microtus* brain. (D, E) Scatter plot graphs of the cell body size (in  $\mu\text{m}^2$ ) of Iba1+ cells within the SEZ of different rodent populations, according to life conditions (lab or wild), seasons, species and numbers of chromosomes. [Individual values are shown with different colours and shapes, as explained in Suppl. Figure 1. Mean values are shown with red lines and error bars depict the SEM. Comparisons were performed using one-way ANOVA followed by Tukey’s *post-hoc* analysis. “n.s.”: not significant]. (F) Raw data of the histological analysis of brain tissue sections, across the rostro-caudal axis based on the mouse brain atlas (Paxinos and Franklin, 2019), recording the presence of the choroid plexus. The plexus’s presence is depicted with grey and the section was given “1” point, while its absence is depicted with white and was attributed “0” points (as exemplified for the first row). The average score for each animal group was calculated and statistical analysis was performed using one-way ANOVA [overall  $F=3.70$  and  $p=0.009$ ; for groups with  $n \geq 3$ , post hoc analysis was performed, and significant results are shown]. (G,H) Low magnification composite microphotographs of DAPI-stained tissue sections showing a rostral (in G) and a caudal (in H) level. Note the presence of choroid plexus filling the ventricle (indicated by a star) in wild animals, and only a small fragment of the choroid plexus at the ventral floor of the ventricle in a Lab mouse in “H” (indicated by the white arrow) [scale bars: 200 $\mu\text{m}$ ].



73 **Supplemental Table 1. Details of the wild animals used in the study.**

74 The collection sites are shown in Suppl. Figure 1. “*M.m.dom*”: *Mus musculus domesticus*. In gender, M= Male, F= Female. Karyo=  
75 karyotype, showing the diploid numbers; Fundamental numbers, for Mus=40, for Microtus=46. Date of sacrifice in the form: DD-  
76 MM-YY. “W.B.L.”: whole body length. “T.L.”: tail length. “E.L.”: ear length. “H.F.L.”: hind foot length

77

| Animal number | Location of collection (Greece) | Animal species                 | Gender | Karyotype (2n) | Date of Sacrifice | Process of sacrifice | Cell Culture     | Histology        | Weight (g) | Whole Body Length (mm) | Tail Length (mm) | Ear Length (mm) | Hind Foot Length (mm) |
|---------------|---------------------------------|--------------------------------|--------|----------------|-------------------|----------------------|------------------|------------------|------------|------------------------|------------------|-----------------|-----------------------|
| R581          | Antirio, Aitolokarnania         | <i>Mus musculus domesticus</i> | M      | 40             | 6-11-2015         | i.v.p. (saline)      | -                | total brain      | 14.71      | 167                    | 87               | 15              | 18                    |
| R582          | Marathias, Fokida               | <i>Mus musculus domesticus</i> | M      | 40             | 12-11-2015        | i.v.p. (saline)      | -                | total brain      | 12.05      | 146                    | 75               | 14              | 15                    |
| R583          | Makynela, Aitolokarnania        | <i>Mus musculus domesticus</i> | F      | 40             | 12-11-2015        | i.v.p. (saline)      | -                | total brain      | 9.76       | 137                    | 73               | 12.5            | 17                    |
| R584          | Trikorfo, Aitolokarnania        | <i>Mus musculus domesticus</i> | M      | 40             | 12-11-2015        | i.v.p. (saline)      | -                | total brain      | 13.25      | 160                    | 85               | 14              | 17                    |
| R586          | Trikorfo, Aitolokarnania        | <i>Mus musculus domesticus</i> | F      | 37             | 13-11-2015        | i.v.p. (saline)      | -                | total brain      | 15.4       | 166                    | 86               | 14.5            | 17                    |
| R597          | Trikorfo, Aitolokarnania        | <i>Mus musculus domesticus</i> | F      | 37             | 10-12-2015        | i.v.p. (saline)      | -                | total brain      | 8.98       | 128                    | 67               | 14              | 16                    |
| R599          | Trikorfo, Aitolokarnania        | <i>Mus musculus domesticus</i> | M      | 37             | 11-12-2015        | i.v.p. (saline)      | -                | total brain      | 8.45       | 127                    | 64               | 12              | 16                    |
| R600          | Trikorfo, Aitolokarnania        | <i>Mus musculus domesticus</i> | M      | 37             | 11-12-2015        | i.v.p. (saline)      | -                | total brain      | 8.27       | 123                    | 66               | 12.5            | 17                    |
| R613          | Elekistra, Achaia               | <i>Mus musculus domesticus</i> | F      | 30             | 26-2-2015         | i.v.p. (saline)      | -                | total brain      | 23.44      | 175                    | 92               | 16              | 17                    |
| R614          | Elekistra, Achaia               | <i>Mus musculus domesticus</i> | F      | 30             | 2-3-2016          | i.v.p. (saline)      | -                | total brain      | 16         | 155                    | 79               | 13              | 15                    |
| R617          | Elekistra, Achaia               | <i>Mus musculus domesticus</i> | F      | 30             | 3-3-2016          | i.v.p. (saline)      | -                | total brain      | 10.69      | 147                    | 82               | 14.5            | 16                    |
| R619          | Elekistra, Achaia               | <i>Mus musculus domesticus</i> | M      | 30             | 8-3-2016          | i.v.p. (saline)      | -                | total brain      | 9.14       | 134                    | 71               | 12              | 17                    |
| R625          | Argyra, Achaia                  | <i>Microtus thomasi</i>        | F      | 40             | 31-3-2016         | i.v.p. (saline)      | -                | total brain      | 9.04       | 86                     | 17               | 8               | 14                    |
| R626          | Argyra, Achaia                  | <i>Microtus thomasi</i>        | M      | 40             | 31-3-2016         | i.v.p. (saline)      | -                | total brain      | 9.26       | 89                     | 17               | 8               | 14                    |
| R627          | Argyra, Achaia                  | <i>Microtus thomasi</i>        | M      | 40             | 31-3-2016         | i.v.p. (saline)      | -                | total brain      | 25.38      | 126                    | 25               | 10              | 15                    |
| Wild Mus 1    | Mavroneri, Voiotia              | <i>Mus musculus domesticus</i> | M      | 26-30          | 21-10-2021        | i.v.p. (saline)      | left hemisphere  | right hemisphere | 13.59      | 168                    | 88               | 14              | 16                    |
| Wild Mus 2    | Mavroneri, Voiotia              | <i>Mus musculus domesticus</i> | F      | 26-30          | 21-10-2021        | i.v.p. (saline)      | right hemisphere | left hemisphere  | 13.89      | 149                    | 75               | 11              | 17                    |
| Wild Mus 3    | Mavroneri, Voiotia              | <i>Mus musculus domesticus</i> | F      | 26-30          | 21-10-2021        | i.v.p. (saline)      | -                | right hemisphere | 15.97      | 171                    | 85               | 11              | 16                    |
| Wild Mus 4    | Mavroneri, Voiotia              | <i>Mus musculus domesticus</i> | M      | 30             | 21-10-2021        | i.v.p. (saline)      | right hemisphere | left hemisphere  | 17.26      | 169                    | 85               | 14              | 16                    |
| Wild Mus 5    | Mavroneri, Voiotia              | <i>Mus musculus domesticus</i> | M      | 26-30          | 21-10-2021        | i.v.p. (saline)      | left hemisphere  | right hemisphere | 13.4       | 152                    | 74               | 11              | 15                    |
| Wild Mus 6    | Mavroneri, Voiotia              | <i>Mus musculus domesticus</i> | M      | 30             | 10-3-2022         | i.v.p. (saline)      | -                | left hemisphere  | 17.88      | 177                    | 98               | 14.5            | 17                    |
| Wild Mus 7    | Mavroneri, Voiotia              | <i>Mus musculus domesticus</i> | F      | 27             | 10-3-2022         | i.v.p. (saline)      | -                | right hemisphere | 13.13      | 150                    | 80               | 14              | 16                    |
| Wild Mus 8    | Mavroneri, Voiotia              | <i>Mus musculus domesticus</i> | M      | 28             | 10-3-2022         | i.v.p. (saline)      | right hemisphere | left hemisphere  | 20.42      | 175                    | 92               | 14.5            | 17                    |
| Wild Mus 9    | Mavroneri, Voiotia              | <i>Mus musculus domesticus</i> | M      | 27             | 11-3-2022         | i.v.p. (saline)      | left hemisphere  | right hemisphere | 13.9       | —                      | 85               | 14              | 17                    |
| Wild Mus 10   | Mavroneri, Voiotia              | <i>Mus musculus domesticus</i> | F      | 27             | 11-3-2022         | i.v.p. (saline)      | right hemisphere | left hemisphere  | 18         | 170                    | 89               | 14.5            | 17                    |
| Wild Mus 11   | Mavroneri, Voiotia              | <i>Mus musculus domesticus</i> | M      | 26             | 11-3-2022         | i.v.p. (saline)      | left hemisphere  | right hemisphere | 17.24      | 174                    | 92               | 14.5            | 17                    |
| Wild Mus 13   | Mavroneri, Voiotia              | <i>Mus musculus domesticus</i> | M      | 26-30          | 11-10-2023        | i.v.p. (saline)      | both hemispheres | no               | 18.25      | 166                    | 83               |                 |                       |
| Microtus 1    | Kydonies, Achaia                | <i>Microtus thomasi</i>        | M      | 40             | 24-11-2021        | i.v.p. (saline)      | right hemisphere | left hemisphere  | 25.78      | 119                    | 25               | 6               | 15                    |
| Microtus 2    | Kydonies, Achaia                | <i>Microtus thomasi</i>        | F      | 40             | 24-11-2021        | i.v.p. (saline)      | left hemisphere  | right hemisphere | 23.71      | 120                    | 18               | 7               | 15                    |
| Microtus 3    | Kydonies, Achaia                | <i>Microtus thomasi</i>        | M      | 40             | 24-11-2021        | i.v.p. (saline)      | right hemisphere | left hemisphere  | 25.3       | 119                    | 16               | 8               | 15                    |
| Microtus 4    | Kydonies, Achaia                | <i>Microtus thomasi</i>        | M      | 40             | 24-11-2021        | i.v.p. (saline)      | left hemisphere  | right hemisphere | 22.91      | 119                    | 16               | 8               | 15                    |
| Microtus 5    | Kydonies, Achaia                | <i>Microtus thomasi</i>        | F      | 40             | 24-11-2021        | i.v.p. (saline)      | right hemisphere | left hemisphere  | 23.67      | 118                    | 19               | 7               | 16                    |
| Microtus 6    | Kydonies, Achaia                | <i>Microtus thomasi</i>        | M      | 40             | 30-11-2021        | i.v.p. (saline)      | -                | right hemisphere | 24.14      | 118                    | 19               | 9               | 15                    |
| Microtus 7    | Kydonies, Achaia                | <i>Microtus thomasi</i>        | M      | 40             | 30-11-2021        | i.v.p. (saline)      | right hemisphere | left hemisphere  | 23.5       | 120                    | 16               | 9               | 15                    |
| Microtus 8    | Kydonies, Achaia                | <i>Microtus thomasi</i>        | M      | 40             | 30-11-2021        | i.v.p. (saline)      | -                | left hemisphere  | 24.93      | 115                    | 19               | 8               | 15                    |
| Microtus 9    | Kydonies, Achaia                | <i>Microtus thomasi</i>        | M      | 40             | 30-11-2021        | i.v.p. (saline)      | left hemisphere  | right hemisphere | 20.34      | 117                    | 21               | 9               | 18                    |

**80    *Supplemental Table 2. Details of the statistical comparisons of in vivo data***

81    Summary of the comparisons that were performed using the data generated by the  
82    immunohistochemical analysis of tissue sections. The table is separated according to the  
83    animal groups compared (based on habitat, species, season and number of chromosomes)  
84    and the brain area analysed (SEZ or CC). Two main types of statistical analyses were  
85    performed: one-way ANOVA or Pearson's correlation. Variables and the respective  
86    statistical values shown in grey returned non-significant results. In the last column we refer  
87    the Figure in which the data are shown in the form of graph.

|                                                                                                                                                                                     | <b>Variables</b>               | <b>Statistical tools &amp; metrics</b>                           | <b>Location in the manuscript</b> |
|-------------------------------------------------------------------------------------------------------------------------------------------------------------------------------------|--------------------------------|------------------------------------------------------------------|-----------------------------------|
| <b>The effects of habitat, seasons and species</b><br><b>Wild40 (control), Lab40<sup>AUTUMN</sup>, Lab40<sup>SPRING</sup>, Microtus<sup>AUTUMN</sup>, Microtus<sup>SPRING</sup></b> |                                |                                                                  |                                   |
|                                                                                                                                                                                     |                                | <u>One-way ANOVA (Tukey's post-hoc analysis shown on graphs)</u> |                                   |
| <b>In the SEZ</b>                                                                                                                                                                   | <i>PCNA density</i>            | F=4.631, p<0.001                                                 | <i>Fig 1F</i>                     |
|                                                                                                                                                                                     | <i>Dcx density</i>             | F=3,954, p=0.001                                                 | <i>Fig 1G</i>                     |
|                                                                                                                                                                                     | %PCNA                          | F=4.060, p=0.001                                                 | <i>Sup Fig 2D</i>                 |
|                                                                                                                                                                                     | %Dcx                           | F=5.830, p<0.001                                                 | <i>Sup Fig 2E</i>                 |
|                                                                                                                                                                                     | <i>Olig2 density</i>           | F=1.727, p=0.214                                                 | <i>Fig 3B</i>                     |
|                                                                                                                                                                                     | <i>Iba1 density</i>            | F=0.774, p=0.645                                                 | <i>Fig 3C</i>                     |
|                                                                                                                                                                                     | <i>Iba1 cell body size</i>     | F=2.386, p=0.089                                                 | <i>Sup Fig 4D</i>                 |
|                                                                                                                                                                                     | <i>Supporting cell density</i> | F=1.759, p=0.105                                                 | <i>Sup Fig 3A</i>                 |
| <b>In the CC</b>                                                                                                                                                                    | <i>Olig2 PCNA density</i>      | F=1.609, p=0.261                                                 | <i>Fig 4C</i>                     |
|                                                                                                                                                                                     | <i>Olig2 PCNA/Olig2</i>        | F=1.442, p=0.364                                                 | <i>Fig 4E</i>                     |
|                                                                                                                                                                                     | <i>Sox2 density</i>            | F=4.382, p=0.033                                                 | <i>Fig 4G</i>                     |
|                                                                                                                                                                                     | <i>Iba1 density</i>            | F=2.657, p=0.081                                                 | <i>Fig 4J</i>                     |
| <b>The effects of chromosome numbers in AUTUMN</b><br><b>Wild40 (control), Wild37, Wild30, Wild26-30</b><br><b>correlation with “2n” and comparison vs Lab40</b>                    |                                |                                                                  |                                   |
|                                                                                                                                                                                     |                                | <u>Pearson's correlation</u>                                     |                                   |
| <b>In the SEZ AUTUMN</b>                                                                                                                                                            | <i>PCNA density</i>            | $\rho=0.965$                                                     | <i>Fig 2C</i>                     |
|                                                                                                                                                                                     | <i>Dcx density</i>             | $\rho=0.961$                                                     | <i>Fig 2E</i>                     |
|                                                                                                                                                                                     | %PCNA                          | $\rho=0.934$                                                     | <i>Sup Fig 2F</i>                 |
|                                                                                                                                                                                     | %Dcx                           | $\rho=0.936$                                                     | <i>Sup Fig 2H</i>                 |
|                                                                                                                                                                                     | <i>Olig2 density</i>           | $\rho=0.414$                                                     | <i>Fig 3C</i>                     |

|                                                                                                                                                     |                                |                                                                     |                   |
|-----------------------------------------------------------------------------------------------------------------------------------------------------|--------------------------------|---------------------------------------------------------------------|-------------------|
|                                                                                                                                                     | <i>Iba1 density</i>            | $\rho=0.395$                                                        | <i>Fig 3D</i>     |
|                                                                                                                                                     | <i>Supporting cell density</i> | Not enough power                                                    | <i>Sup Fig 3B</i> |
| <b>In the CC AUTUMN</b>                                                                                                                             | <i>Olig2 PCNA density</i>      | $\rho=0.544$                                                        | <i>Fig 4D</i>     |
|                                                                                                                                                     | <i>Olig2 PCNA/Olig2</i>        | $\rho=-0.246$                                                       | <i>Fig 4F</i>     |
|                                                                                                                                                     | <i>Sox2 density</i>            | $\rho=0.706$                                                        | <i>Fig 4H</i>     |
|                                                                                                                                                     | <i>Iba1 density</i>            | $\rho=-0.463$                                                       | <i>Fig 4K</i>     |
|                                                                                                                                                     |                                | <u>One-way ANOVA (Tukey's post-hoc analysis vs Lab40 on graphs)</u> |                   |
| <b>In the SEZ AUTUMN</b>                                                                                                                            | <i>PCNA density</i>            | $F=4.631, p<0.001$                                                  | <i>Fig 2C</i>     |
|                                                                                                                                                     | <i>Dcx density</i>             | $F=3,954, p=0.001$                                                  | <i>Fig 2E</i>     |
|                                                                                                                                                     | <i>%PCNA</i>                   | $F=4.060, p=0.001$                                                  | <i>Sup Fig 2F</i> |
|                                                                                                                                                     | <i>%Dcx</i>                    | $F=5.830, p<0.001$                                                  | <i>Sup Fig 2H</i> |
|                                                                                                                                                     | <i>Olig2 density</i>           | $F=1.727, p=0.214$                                                  | <i>Fig 3C</i>     |
|                                                                                                                                                     | <i>Iba1 density</i>            | $F=0.774, p=0.645$                                                  | <i>Fig 3D</i>     |
|                                                                                                                                                     | <i>Iba1 cell body size</i>     | $F=2.386, p=0.089$                                                  | <i>Sup Fig 4E</i> |
|                                                                                                                                                     | <i>Supporting cell density</i> | $F=1.759, p=-0.105$                                                 | <i>Sup Fig 3B</i> |
| <b>In the CC AUTUMN</b>                                                                                                                             | <i>Olig2 PCNA density</i>      | $F=1.609, p=0.261$                                                  | <i>Fig 4D</i>     |
|                                                                                                                                                     | <i>Olig2 PCNA/Olig2</i>        | $F=1.442, p=0.364$                                                  | <i>Fig 4F</i>     |
|                                                                                                                                                     | <i>Sox2 density</i>            | $F=4.382, p=0.033$                                                  | <i>Fig 4G</i>     |
|                                                                                                                                                     | <i>Iba1 density</i>            | $F=2.657, p=0.081$                                                  | <i>Fig 4K</i>     |
| <b>The effects of chromosome numbers in SPRING</b><br><b>Wild30, Wild28, Wild27, Wild26</b><br><b>correlation with “2n” and comparison vs Lab40</b> |                                |                                                                     |                   |
|                                                                                                                                                     |                                | <u>Pearson's correlation</u>                                        |                   |
|                                                                                                                                                     | <i>PCNA density</i>            | $\rho=0.934$                                                        | <i>Fig 2D</i>     |
|                                                                                                                                                     | <i>Dcx density</i>             | $\rho=0.878$                                                        | <i>Fig 2E</i>     |

|                              |                                |                                                                     |                   |
|------------------------------|--------------------------------|---------------------------------------------------------------------|-------------------|
| <b>In the SEZ<br/>SPRING</b> | %PCNA                          | $\rho=0.933$                                                        | <i>Sup Fig 2G</i> |
|                              | %Dcx                           | $\rho=0.860$                                                        | <i>Sup Fig 2I</i> |
|                              | <i>Olig2 density</i>           | $\rho=-0.032$                                                       | <i>Fig 3C</i>     |
|                              | <i>Iba1 density</i>            | $\rho=-0.701$                                                       | <i>Fig 3D</i>     |
|                              | <i>Supporting cell density</i> | $\rho=-0.248$                                                       | <i>Sup Fig 3C</i> |
| <b>In the CC<br/>SPRING</b>  | <i>Olig2 PCNA density</i>      | $\rho=0.072$                                                        | <i>Fig 4D</i>     |
|                              | <i>Olig2 PCNA/Olig2</i>        | $\rho=-0.021$                                                       | <i>Fig 4F</i>     |
|                              | <i>Sox2 density</i>            | $\rho=0.995$                                                        | <i>Fig 4I</i>     |
|                              | <i>Iba1 density</i>            | $\rho=-0.757$                                                       | <i>Fig 4K</i>     |
|                              |                                | <u>One-way ANOVA (Tukey's post-hoc analysis vs Lab40 on graphs)</u> |                   |
| <b>In the SEZ<br/>SPRING</b> | <i>PCNA density</i>            | $F=4.631, p<0.001$                                                  | <i>Fig 2D</i>     |
|                              | <i>Dcx density</i>             | $F=3,954, p=0.001$                                                  | <i>Fig 2E</i>     |
|                              | %PCNA                          | $F=4.060, p=0.001$                                                  | <i>Sup Fig 2G</i> |
|                              | %Dcx                           | $F=5.830, p<0.001$                                                  | <i>Sup Fig 2I</i> |
|                              | <i>Olig2 density</i>           | $F=1.727, p=0.214$                                                  | <i>Fig 3C</i>     |
|                              | <i>Iba1 density</i>            | $F=0.774, p=0.645$                                                  | <i>Fig 3D</i>     |
|                              | <i>Iba1 cell body size</i>     | $F=2.386, p=0.089$                                                  | <i>Sup Fig 4E</i> |
|                              | <i>Supporting cell density</i> | $F=1.759, p=-0.105$                                                 | <i>Sup Fig 3C</i> |
| <b>In the CC<br/>SPRING</b>  | <i>Olig2 PCNA density</i>      | $F=1.609, p=0.261$                                                  | <i>Fig 4D</i>     |
|                              | <i>Olig2 PCNA/Olig2</i>        | $F=1.442, p=0.364$                                                  | <i>Fig 4F</i>     |
|                              | <i>Sox2 density</i>            | $F=4.382, p=0.033$                                                  | <i>Fig 4I</i>     |
|                              | <i>Iba1 density</i>            | $F=2.657, p=0.081$                                                  | <i>Fig 4K</i>     |

89

90
